# Supplementary material
Source: PubMed Central journal article supplement (PMC5244462)
Supplement: JOA-230-325-s001.pdf [file JOA-230-325-s001.pdf]

**Journal of Anatomy - Evolutionary Morphology**  
Online Supplement for

**Body cavity volume reconstruction in terrestrial tetrapods**

Marcus Clauss, Irina Nurutdinova, Carlo Meloro, Hanns-Christian Gunga, Duofang Jiang, Johannes Koller, Bernd Herkner, P. Martin Sander, Olaf Hellwich

Correspondence  
mclauss@vetclinics.uzh.ch

**Basal synapsids/ mammal-like reptiles**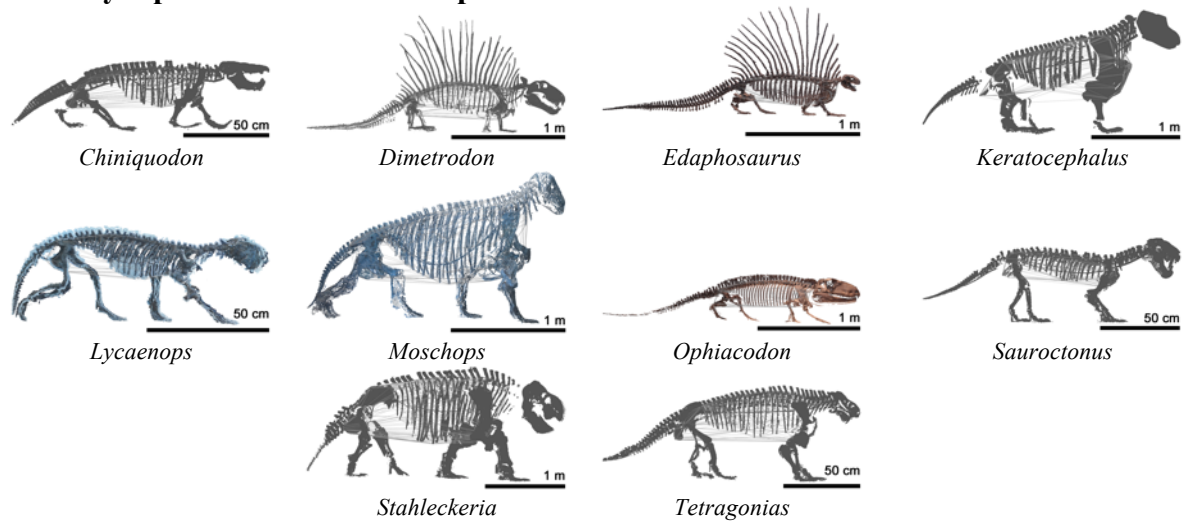

**Figure S1.** 3D skeleton reconstructions of early synapsids (incl. indications of the convex hull of the body cavity).

**Mammals**

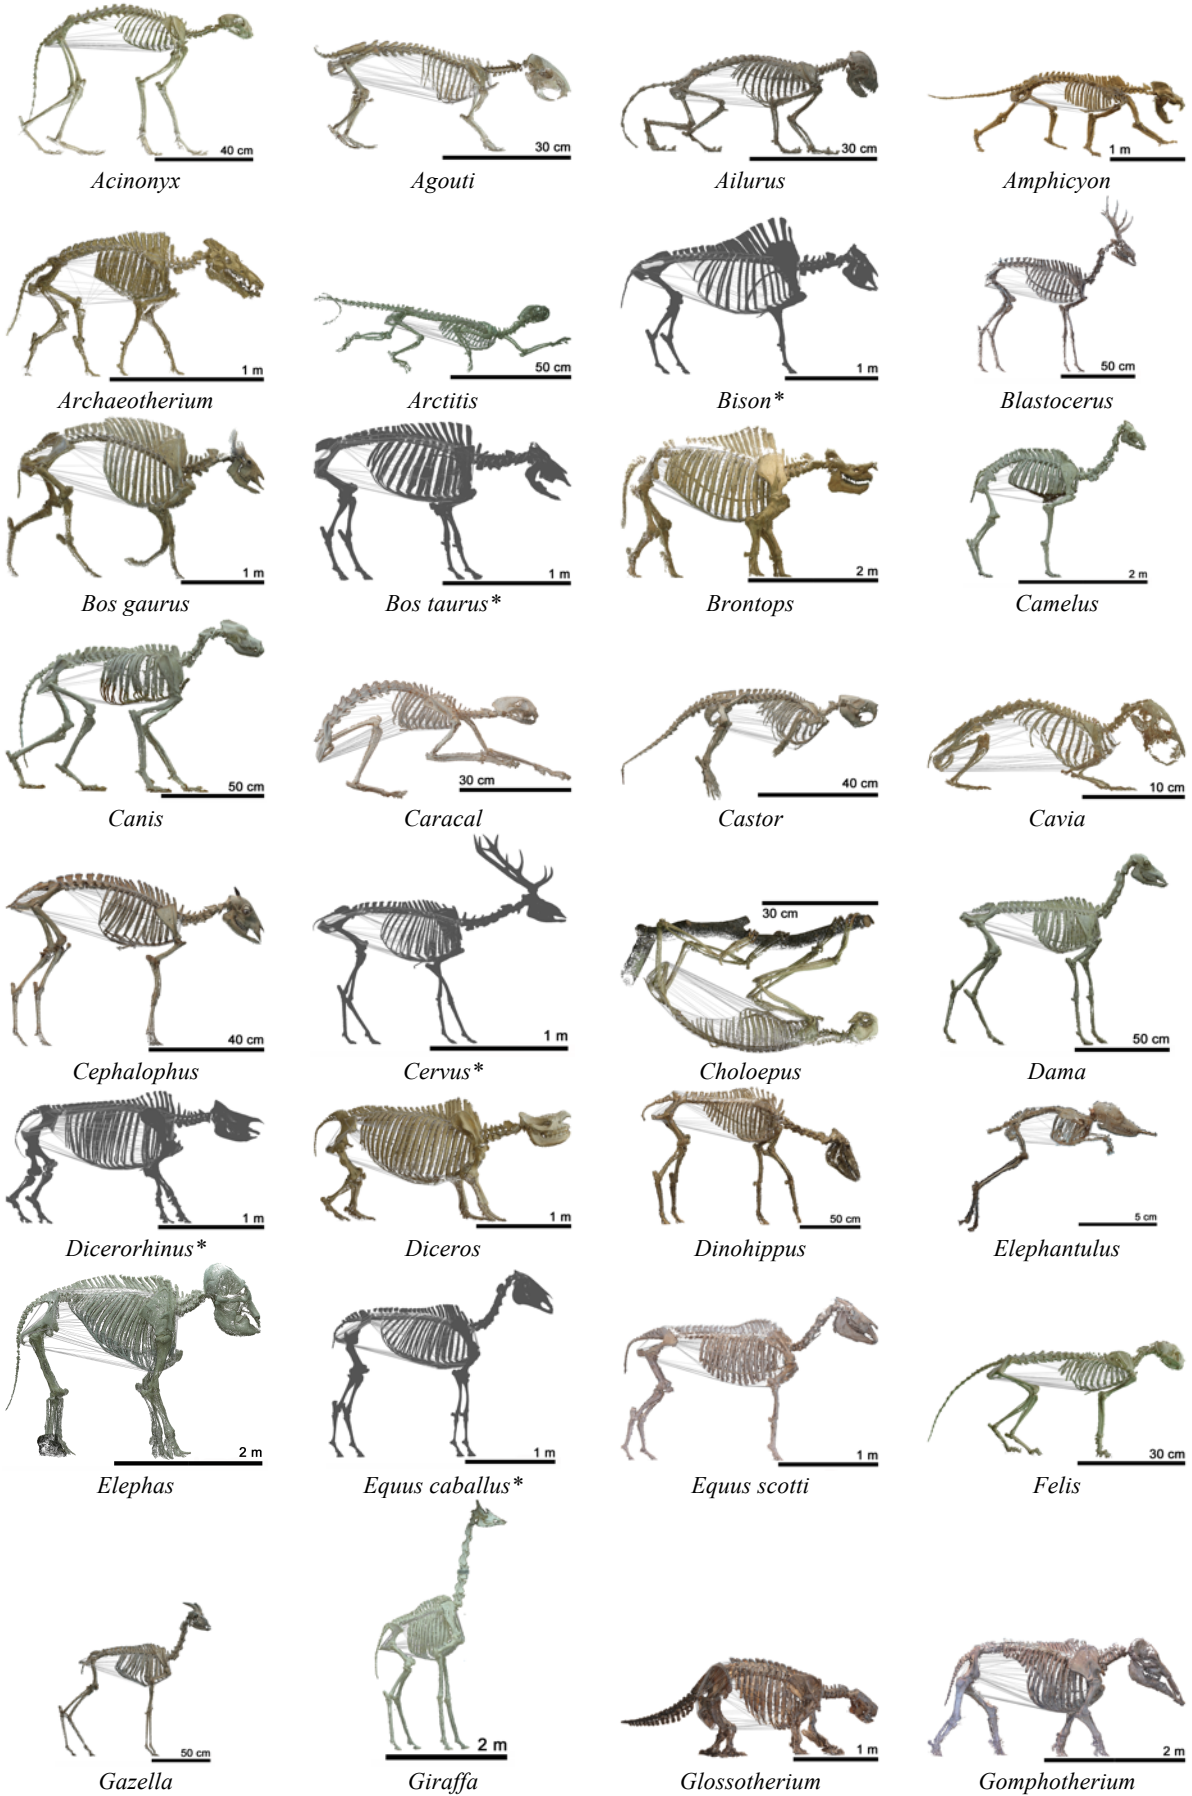

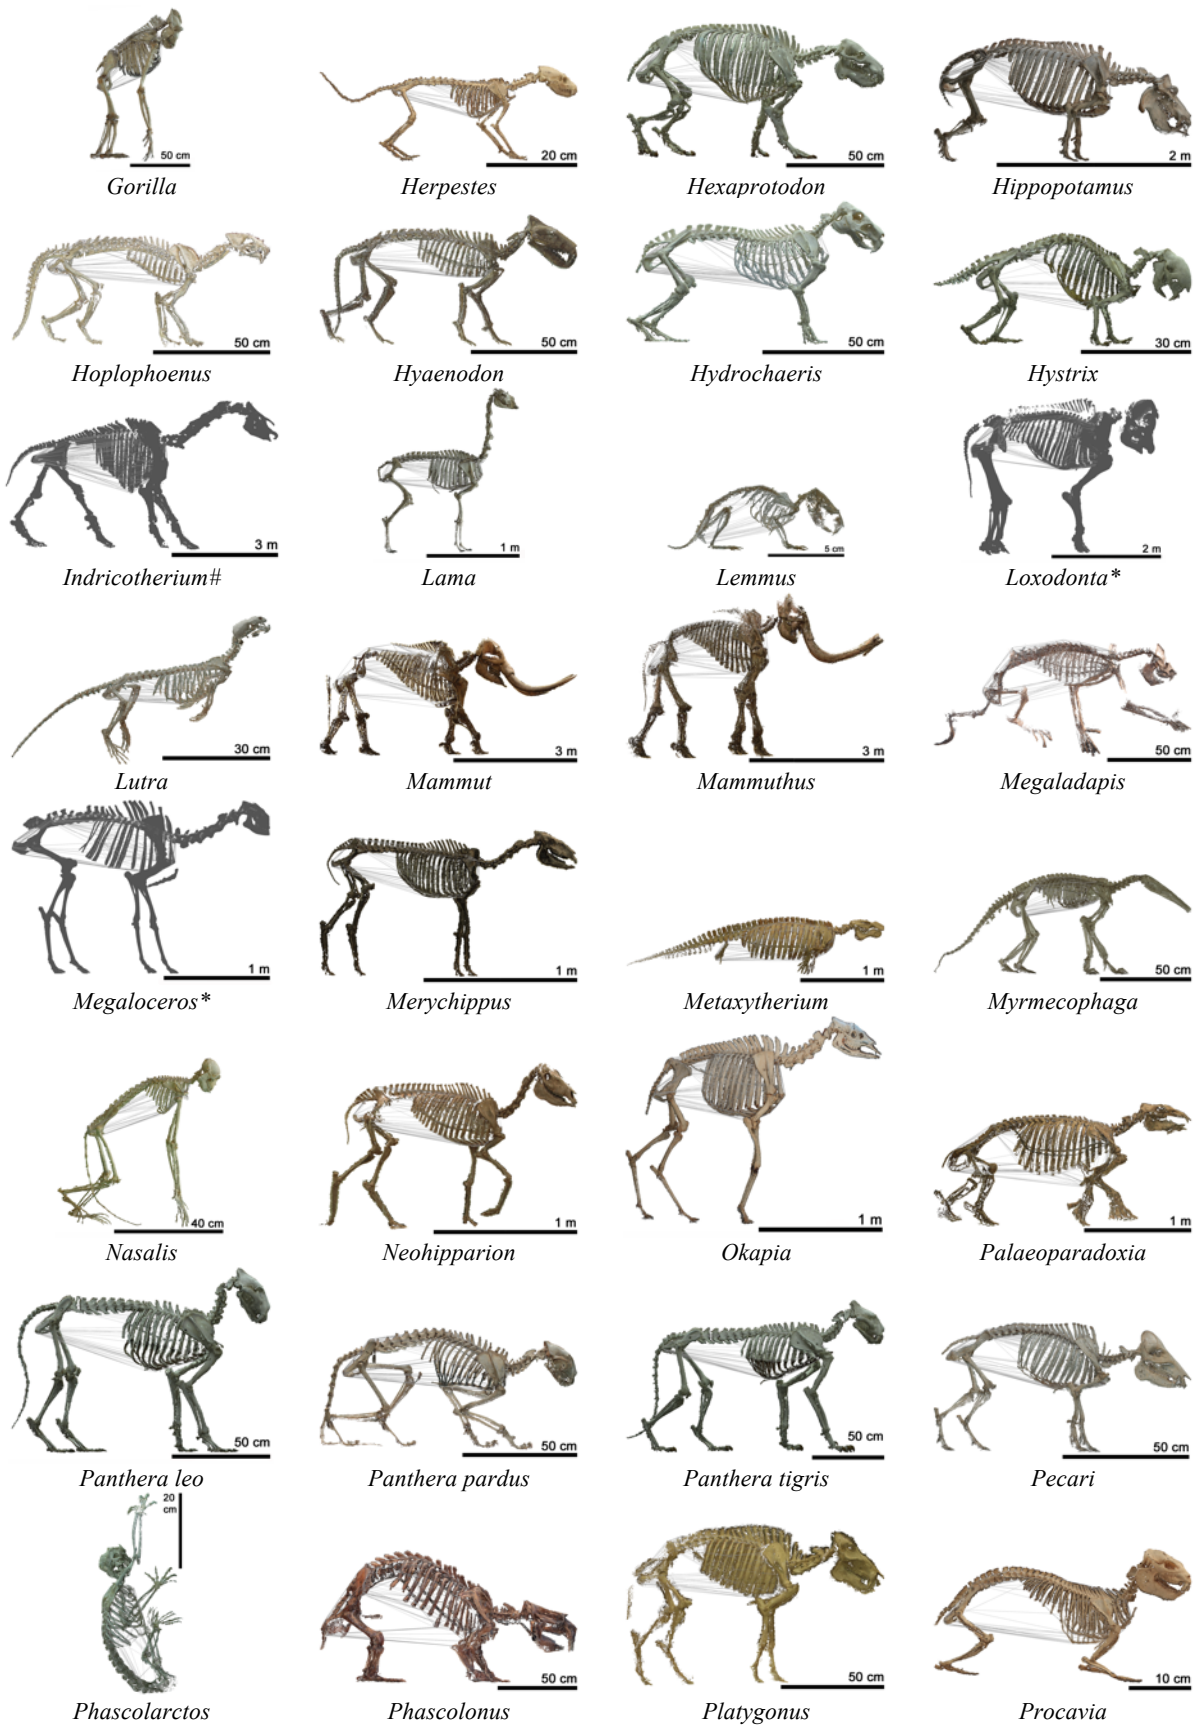

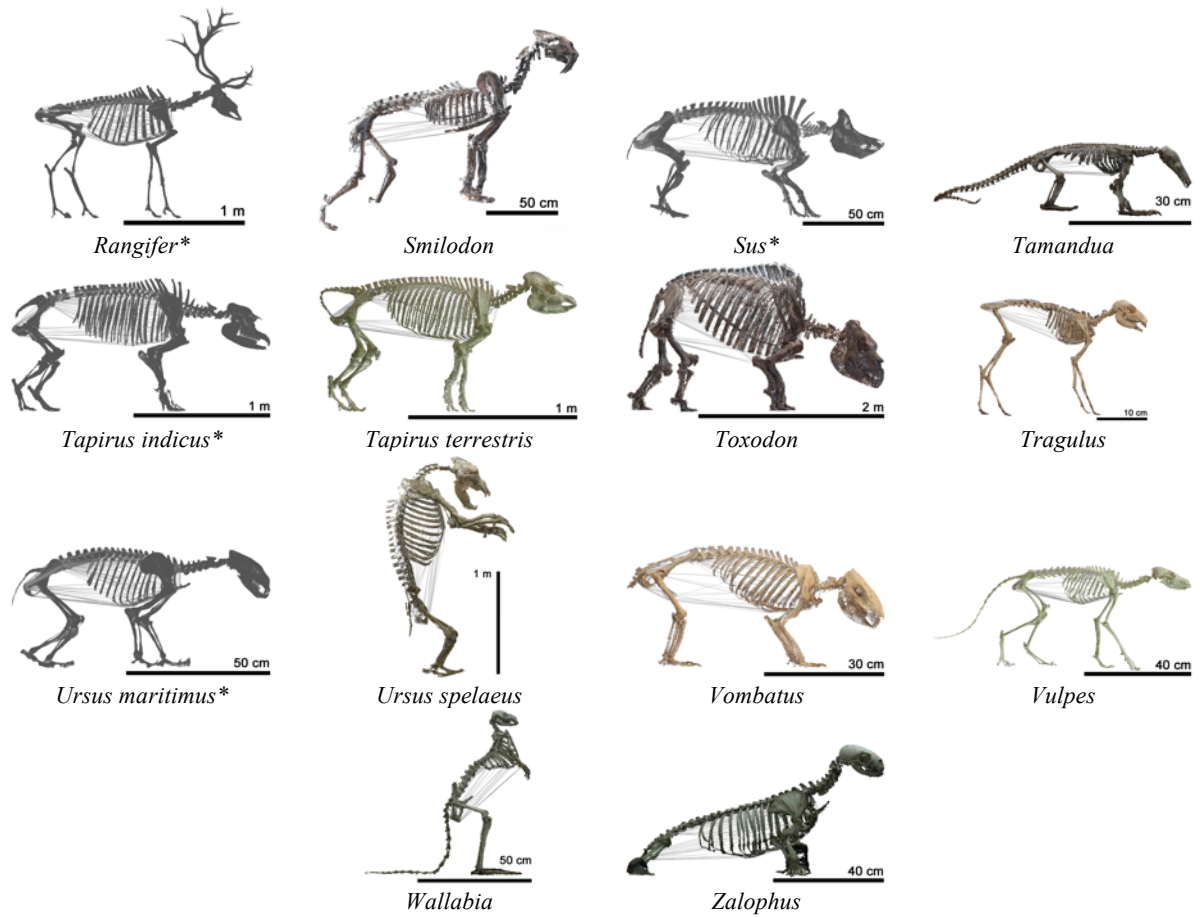

**Figure S2.** 3D skeleton reconstructions of mammals (incl. indications of the convex hull of the body cavity). Reconstructions from this study, except \*(from Sellers et al., 2012) and #(from Stoinski et al., 2011).

**Birds**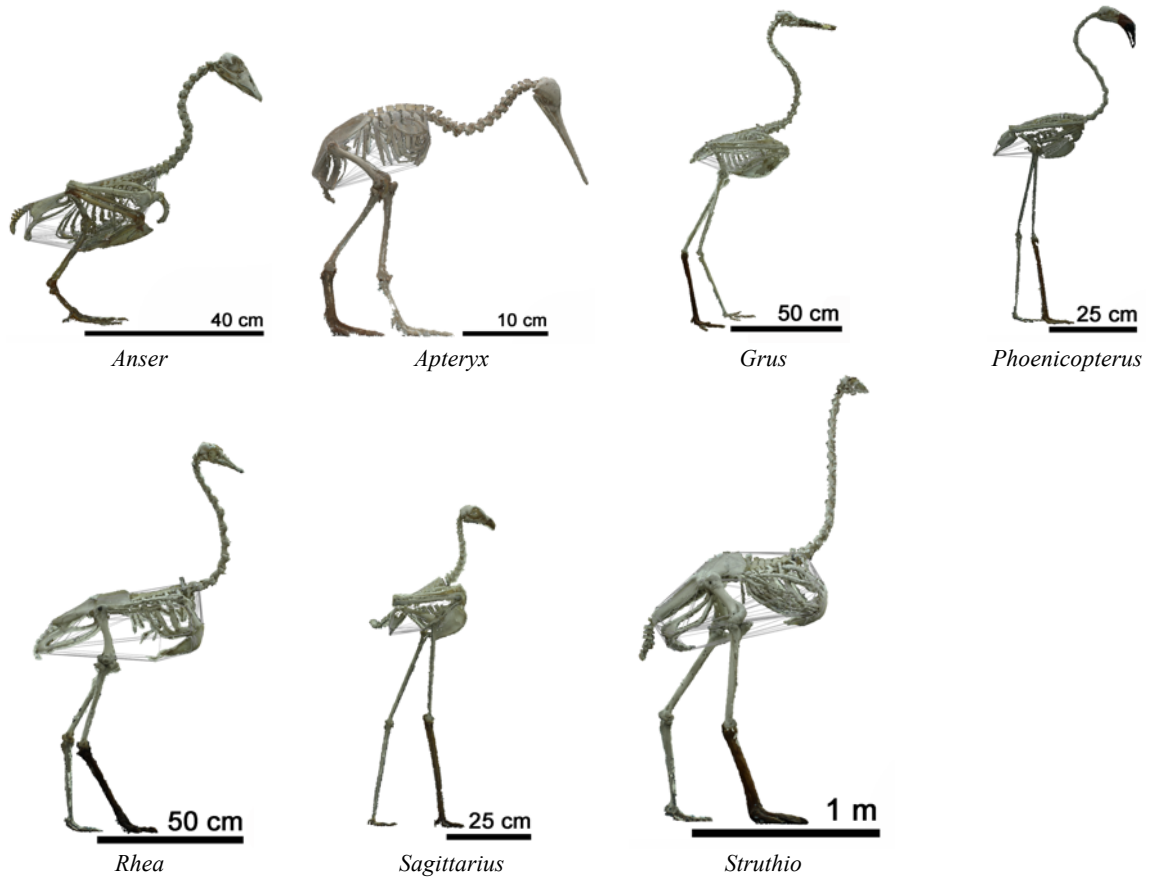

**Figure S3.** 3D skeleton reconstructions of birds (incl. indications of the convex hull of the body cavity).

## Non-avian dinosaurs

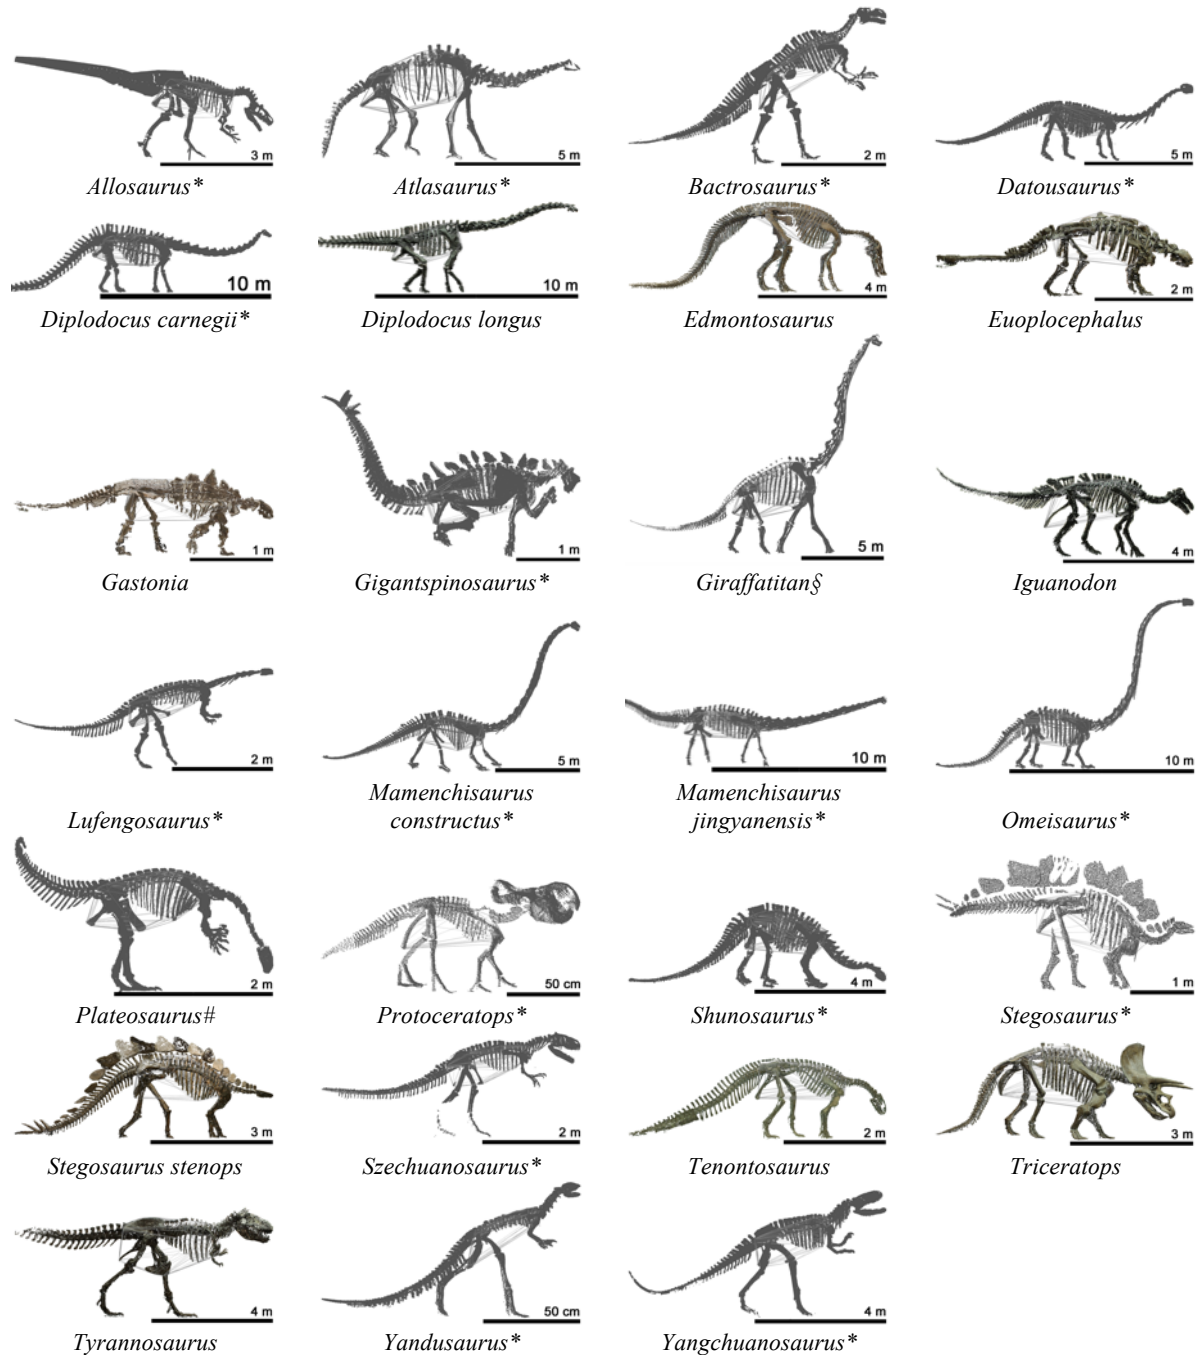

**Figure S4.** 3D skeleton reconstructions of non-avian dinosaurs (incl. indications of the convex hull of the body cavity). Reconstructions from this study, except # (from Gunga et al., 2007), § (from Gunga et al., 2008), \* (from Stoinski et al., 2011).

## Reptiles

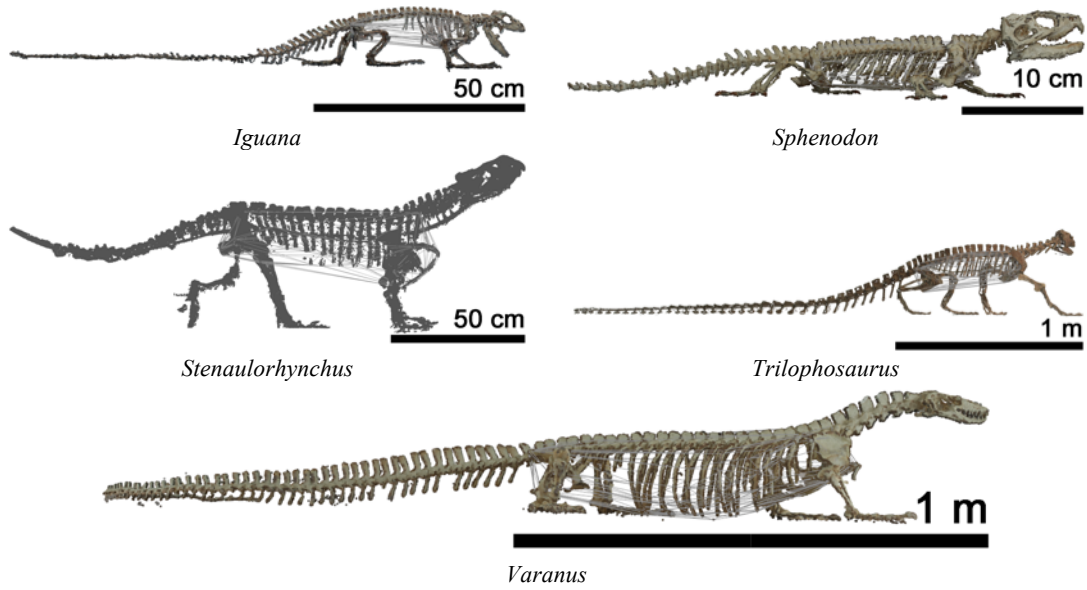

## Amphibia

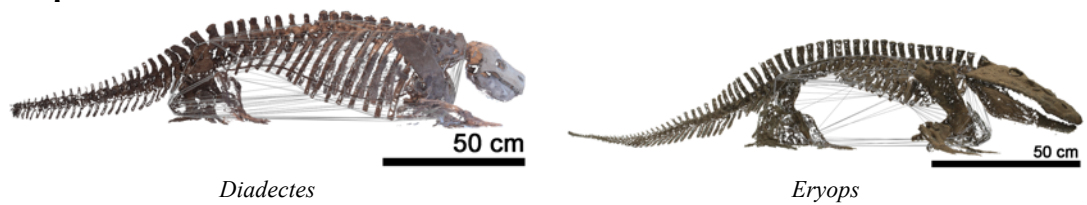

**Figure S5.** 3D skeleton reconstructions of reptiles and amphibia (incl. indications of the convex hull of the body cavity).



**Table S1.** Specimens used in this study, categories and measurements

| Specimen as taken                                                 | Species name in tree           | Food <sup>a</sup> | Chew <sup>b</sup> | Femur length<br>cm | Torso volume<br>cm <sup>3</sup> | Free-hull ratio | Mirrored/<br>split torso | Origin <sup>c</sup> | Source <sup>d</sup> | ID<br>at Origin |
|-------------------------------------------------------------------|--------------------------------|-------------------|-------------------|--------------------|---------------------------------|-----------------|--------------------------|---------------------|---------------------|-----------------|
| <b>Early synapsids</b>                                            |                                |                   |                   |                    |                                 |                 |                          |                     |                     |                 |
| <i>Chiniquodon theotonicus</i><br>( <i>Belesodon magnificus</i> ) | <i>Chiniquodon theotonicus</i> | carn              |                   | 16.45              | 25257.3                         | 0.235           | mirr                     | GPIT                | 1                   | RE-07112        |
| <i>Dimetrodon incisivus</i>                                       | <i>Dimetrodon incisivus</i>    | carn              |                   | 17.99              | 52310.0                         | 0.084           | -                        | GPIT                | 1                   | RE-07100        |
| <i>Edaphosaurus boanerges</i>                                     | <i>Edaphosaurus boanerges</i>  | herb              |                   | 18.54              | 38933.1                         | 0.129           | -                        | AMNH                | 1                   | 7003            |
| <i>Keratocephalus moloch</i>                                      | <i>Keratocephalus moloch</i>   | herb              |                   | 32.31              | 591338.0                        | 0.299           | mirr                     | GPIT                | 1                   | RE-07102        |
| <i>Lycaenops ornatus</i>                                          | <i>Lycaenops ornatus</i>       | carn              |                   | 18.18              | 10442.8                         | 0.199           | -                        | AMNH                | 1                   | 2240            |
| <i>Moschops capensis</i>                                          | <i>Moschops capensis</i>       | herb              |                   | 38.28              | 445972.0                        | 0.167           | -                        | AMNH                | 1                   | 5552            |
| <i>Ophiacodon retroversus</i>                                     | <i>Ophiacodon retroversus</i>  | carn              |                   | 17.90              | 32421.0                         | 0.127           | mirr                     | AMNH                | 1                   | 4155            |
| <i>Sauroctonus parringtoni</i>                                    | <i>Sauroctonus parringtoni</i> | carn              |                   | 18.65              | 18277.5                         | 0.207           | -                        | GPIT                | 1                   | RE-07113        |
| <i>Stahleckeria potens</i>                                        | <i>Stahleckeria potens</i>     | herb              |                   | 45.02              | 867003.0                        | 0.172           | -                        | GPIT                | 1                   | RE-07106        |
| <i>Tetragonias (Dicynodon) njalilus</i>                           | <i>Tetragonias njalilus</i>    | herb              |                   | 20.46              | 67309.0                         | 0.258           | -                        | GPIT                | 1                   | RE-08649        |
| <b>Mammals</b>                                                    |                                |                   |                   |                    |                                 |                 |                          |                     |                     |                 |
| <i>Acinonyx jubatus</i>                                           | <i>Acinonyx jubatus</i>        | carn              |                   | 23.23              | 5913.2                          | 0.252           | -                        | ZFMK                | 1                   | MAM 1931.0070   |
| <i>Coelogenys paca</i>                                            | <i>Agouti paca</i>             | herb              |                   | 10.22              | 2212.2                          | 0.307           | -                        | ZMUZ                | 1                   | 10698           |
| <i>Ailurus fulgens</i>                                            | <i>Ailurus fulgens</i>         | herb              |                   | 10.93              | 1457.1                          | 0.203           | mirr                     | BNHM                | 1                   | 8223            |
| <i>Amphicyon ingens</i>                                           | <i>Amphicyon ingens</i>        | carn              |                   | 53.85              | 167553.0                        | 0.220           | -                        | AMNH                | 1                   | FAM 68117/54262 |
| <i>Archaeotherium mortoni</i>                                     | <i>Archaeotherium mortoni</i>  | herb              |                   | 28.58              | 58047.3                         | 0.254           | -                        | AMNH                | 1                   | 11323           |
| <i>Arctictis binturong</i>                                        | <i>Arctictis binturong</i>     | herb              |                   | 15.59              | 4726.7                          | 0.337           | -                        | BNHM                | 1                   | 7553            |
| <i>Bison bison</i>                                                | <i>Bison bison</i>             | herb              |                   | 42.42              | 275565.0                        | 0.093           | -                        |                     | 2                   |                 |
| <i>Blastoceros pampaeus</i>                                       | <i>Blastoceros dichotomus</i>  | herb              |                   | 22.96              | 16767.9                         | 0.237           | -                        | AMNH                | 1                   | 11202           |
| <i>Bos gaurus</i>                                                 | <i>Bos frontalis</i>           | herb              |                   | 56.48              | 545800.0                        | 0.243           | -                        | AMNH                | 1                   | 18465           |
| <i>Bos taurus</i>                                                 | <i>Bos taurus</i>              | herb              |                   | 37.37              | 145353.0                        | 0.214           | -                        |                     | 2                   |                 |
| <i>Brontops robustus</i>                                          | <i>Brontops robustus</i>       | herb              |                   | 80.50              | 1569812.0                       | 0.138           | -                        | AMNH                | 1                   | 518             |
| <i>Camelus dromedarius</i>                                        | <i>Camelus dromedarius</i>     | herb              |                   | 54.66              | 284066.0                        | 0.163           | -                        | DMUG                | 1                   | no ID           |
| <i>Canis canis</i>                                                | <i>Canis lupus</i>             | carn              |                   | 26.45              | 22138.5                         | 0.193           | split                    | DMUG                | 1                   | no ID           |
| <i>Caracal caracal</i>                                            | <i>Caracal caracal</i>         | carn              |                   | 17.13              | 2708.5                          | 0.323           | split                    | BNHM                | 1                   | 10766           |
| <i>Castor canadensis</i>                                          | <i>Castor canadensis</i>       | herb              |                   | 11.40              | 5654.2                          | 0.250           | -                        | BNHM                | 1                   | 1997            |

(ctd.)

| Specimen as taken                    | Species name in tree                 | Food <sup>a</sup> | Chew <sup>b</sup> | Femur length<br>cm | Torso volume<br>cm <sup>3</sup> | Free-hull ratio | Mirrored/<br>split torso | Origin <sup>c</sup> | Source <sup>d</sup> | ID<br>at Origin |
|--------------------------------------|--------------------------------------|-------------------|-------------------|--------------------|---------------------------------|-----------------|--------------------------|---------------------|---------------------|-----------------|
| <i>Cavia porcellus</i>               | <i>Cavia porcellus</i>               | herb              |                   | 4.66               | 354.5                           | 0.360           | -                        | CZAEPW              | 1                   | no ID           |
| <i>Cephalophus niger</i>             | <i>Cephalophus niger</i>             | herb              |                   | 18.00              | 9507.9                          | 0.244           | -                        | BNHM                | 1                   | 2493            |
| <i>Cervus elaphus</i>                | <i>Cervus elaphus</i>                | herb              |                   | 29.12              | 53778.3                         | 0.196           | -                        |                     | 2                   |                 |
| <i>Choloepus didactylus</i>          | <i>Choloepus didactylus</i>          | herb              |                   | 16.87              | 5262.1                          | 0.267           | split                    | ZFMK                | 1                   | no ID           |
| <i>Dama dama</i>                     | <i>Dama dama</i>                     | herb              |                   | 21.17              | 21706.5                         | 0.250           | -                        | DMUG                | 1                   | no ID           |
| <i>Dicerorhinus sumatrensis</i>      | <i>Dicerorhinus sumatrensis</i>      | herb              |                   | 40.91              | 251521.0                        | 0.073           | -                        |                     | 2                   |                 |
| <i>Diceros bicornis</i>              | <i>Diceros bicornis</i>              | herb              |                   | 43.14              | 364154.0                        | 0.054           | -                        | ZFMK                | 1                   | MAM 1934.0047   |
| <i>Dinohippus leidyanus</i>          | <i>Dinohippus leidyanus</i>          | herb              |                   | 33.51              | 73237.2                         | 0.224           | -                        | AMNH                | 1                   | 17224           |
| <i>Elephantulus rozeti</i>           | <i>Elephantulus rozeti</i>           | carn              |                   | 2.41               | 14.7                            | 0.285           | -                        | BNHM                | 1                   | 9159            |
| <i>Elephas maximus</i>               | <i>Elephas maximus</i>               | herb              |                   | 93.09              | 1323760.0                       | 0.193           | -                        | DMUG                | 1                   | no ID           |
| <i>Equus caballus</i>                | <i>Equus caballus</i>                | herb              |                   | 51.65              | 233771.0                        | 0.114           | -                        |                     | 2                   |                 |
| <i>Equus scotti</i>                  | <i>Equus scotti</i>                  | herb              |                   | 41.07              | 209734.0                        | 0.196           | -                        | AMNH                | 1                   | 10606           |
| <i>Felis catus</i>                   | <i>Felis silvestris</i>              | carn              |                   | 12.64              | 1713.9                          | 0.271           | -                        | ZFMK                | 1                   | MAM 1986.0005   |
| <i>Nanger dama</i>                   | <i>Gazella dama</i>                  | herb              |                   | 24.89              | 24901.2                         | 0.174           | -                        | BNHM                | 1                   | 1467            |
| <i>Giraffa camelopardalis</i>        | <i>Giraffa camelopardalis</i>        | herb              |                   | 49.87              | 295159.4                        | 0.061           | -                        | DMUG                | 1                   | no ID           |
| <i>Glossotherium robustus</i>        | <i>Glossotherium robustus</i>        | herb              |                   | 47.08              | 483877.0                        | 0.139           | -                        | AMNH                | 1                   | 11277           |
| <i>Gomphotherium productum</i>       | <i>Gomphotherium productum</i>       | herb              |                   | 66.58              | 2739370.0                       | 0.238           | -                        | AMNH                | 1                   | 10582           |
| <i>Gorilla gorilla</i>               | <i>Gorilla gorilla</i>               | herb              |                   | 38.25              | 43739.2                         | 0.106           | -                        | ZMUZ                | 1                   | 11880           |
| <i>Herpestes brachyurus</i>          | <i>Herpestes brachyurus</i>          | carn              |                   | 7.28               | 676.7                           | 0.269           | -                        | ZMUZ                | 1                   | 10328           |
| <i>Hexaprotodon liberiensis</i>      | <i>Hexaprotodon liberiensis</i>      | herb              |                   | 24.77              | 53075.2                         | 0.180           | -                        | DMUG                | 1                   | no ID           |
| <i>Hippopotamus amphibius</i>        | <i>Hippopotamus amphibius</i>        | herb              |                   | 48.91              | 475857.0                        | 0.192           | -                        | BNHM                | 1                   | 2767            |
| <i>Hoplophoneus primaevus</i>        | <i>Hoplophoneus primaevus</i>        | carn              |                   | 21.35              | 9944.9                          | 0.337           | -                        | AMNH                | 1                   | 1406            |
| <i>Hyaenodon horridus</i>            | <i>Hyaenodon horridus</i>            | carn              |                   | 21.92              | 12888.4                         | 0.279           | -                        | AMNH                | 1                   | 1375            |
| <i>Hydrochaeris hydrochaeris</i>     | <i>Hydrochaeris hydrochaeris</i>     | herb              |                   | 19.87              | 23589.2                         | 0.329           | split                    | DMUG                | 1                   | no ID           |
| <i>Hystrix spp.</i>                  | <i>Hystrix cristata</i>              | herb              |                   | 12.02              | 6234.3                          | 0.273           | -                        | DMUG                | 1                   | no ID           |
| <i>Paraceratherium tianshanensis</i> | <i>Indricotherium transouralicum</i> | herb              |                   | 124.63             | 4969740.0                       | 0.259           | -                        | BCNHM               | 3                   | no ID           |
| <i>Lama guanicoe</i>                 | <i>Lama guanicoe</i>                 | herb              |                   | 32.48              | 71884.6                         | 0.230           | -                        | ZMUZ                | 1                   | 10814           |
| <i>Lemmus lemmus</i>                 | <i>Lemmus lemmus</i>                 | herb              |                   | 2.22               | 25.9                            | 0.393           | -                        | CZAEPW              | 1                   | no ID           |
| <i>Loxodonta africana</i>            | <i>Loxodonta africana</i>            | herb              |                   | 114.99             | 1546200.0                       | 0.155           | -                        |                     | 2                   |                 |

(ctd.)

| Specimen as taken               | Species name in tree            | Food <sup>a</sup> | Chew <sup>b</sup> | Femur length<br>cm | Torso volume<br>cm <sup>3</sup> | Free-hull ratio | Mirrored/<br>split torso | Origin <sup>c</sup> | Source <sup>d</sup> | ID<br>at Origin |
|---------------------------------|---------------------------------|-------------------|-------------------|--------------------|---------------------------------|-----------------|--------------------------|---------------------|---------------------|-----------------|
| <i>Lutra lutra</i>              | <i>Lutra lutra</i>              | carn              |                   | 8.18               | 1841.2                          | 0.198           | split                    | BNHM                | 1                   | 115             |
| <i>Mammot americanum</i>        | <i>Mammot americanum</i>        | herb              |                   | 110.36             | 3563910.0                       | 0.285           | -                        | AMNH                | 1                   | 9951            |
| <i>Mammuthus jeffersoni</i>     | <i>Mammuthus columbi</i>        | herb              |                   | 127.38             | 2541860.0                       | 0.213           | -                        | AMNH                | 1                   | FAM 99927       |
| <i>Megaladapis edwardsi</i>     | <i>Megaladapis edwardsi</i>     | herb              |                   | 23.33              | 42604.3                         | 0.258           | -                        | AMNH                | 1                   | 15868           |
| <i>Megaloceros giganteus</i>    | <i>Megaloceros giganteus</i>    | herb              |                   | 48.07              | 156848.0                        | 0.229           | -                        |                     | 2                   |                 |
| <i>Merychippus quintus</i>      | <i>Merychippus quintus</i>      | herb              |                   | 28.14              | 38294.0                         | 0.232           | -                        | AMNH                | 1                   | 14185           |
| <i>Metaxytherium floridanum</i> | <i>Metaxytherium floridanum</i> | herb              |                   | 17.20              | 279265.0                        | 0.273           | -                        | AMNH                | 1                   | 26838           |
| <i>Myrmecophaga tridactyla</i>  | <i>Myrmecophaga tridactyla</i>  | carn              |                   | 22.46              | 10049.6                         | 0.160           | -                        | ZZ                  | 1                   | no ID           |
| <i>Nasalis larvatus</i>         | <i>Nasalis larvatus</i>         | herb              |                   | 22.27              | 3223.0                          | 0.305           | -                        | ZFMK                | 1                   | MAM 1939.0042   |
| <i>Neohipparion affine</i>      | <i>Neohipparion affine</i>      | herb              |                   | 30.79              | 66395.5                         | 0.268           | -                        | AMNH                | 1                   | 9815            |
| <i>Okapia johnstoni</i>         | <i>Okapia johnstoni</i>         | herb              |                   | 34.36              | 111079.0                        | 0.099           | -                        | BNHM                | 1                   | 3940            |
| <i>Palaeoparadoxia tabatai</i>  | <i>Palaeoparadoxia tabatai</i>  | herb              |                   | 41.96              | 271982.0                        | 0.240           | -                        | AMNH                | 1                   | 129177          |
| <i>Panthera leo</i>             | <i>Panthera leo</i>             | carn              |                   | 30.97              | 31630.9                         | 0.249           | -                        | DMUG                | 1                   | no ID           |
| <i>Panthera pardus</i>          | <i>Panthera pardus</i>          | carn              |                   | 25.07              | 14958.9                         | 0.212           | -                        | BNHM                | 1                   | 273             |
| <i>Panthera tigris</i>          | <i>Panthera tigris</i>          | carn              |                   | 36.84              | 46061.8                         | 0.208           | -                        | DMUG                | 1                   | no ID           |
| <i>Pecari tajacu</i>            | <i>Pecari tajacu</i>            | herb              |                   | 17.68              | 12891.4                         | 0.202           | -                        | BNHM                | 1                   | 1071            |
| <i>Phascolarctos cinereus</i>   | <i>Phascolarctos cinereus</i>   | herb              |                   | 12.96              | 2781.3                          | 0.327           | -                        | BNHM                | 1                   | 6260            |
| <i>Phascolonus gigas</i>        | <i>Phascolonus gigas</i>        | herb              |                   | 33.80              | 168794.0                        | 0.317           | -                        | AMNH                | 1                   | 129499          |
| <i>Platygonus leptorhinus</i>   | <i>Platygonus compressus</i>    | herb              |                   | 21.15              | 25493.9                         | 0.207           | -                        | AMNH                | 1                   | 10388           |
| <i>Procapra capensis</i>        | <i>Procapra capensis</i>        | herb              |                   | 7.65               | 1488.4                          | 0.356           | -                        | ZMUZ                | 1                   | 10850           |
| <i>Rangifer tarandus</i>        | <i>Rangifer tarandus</i>        | herb              |                   | 30.90              | 50442.0                         | 0.100           | -                        |                     | 2                   |                 |
| <i>Smilodon floridanus</i>      | <i>Smilodon fatalis</i>         | carn              |                   | 39.34              | 59137.8                         | 0.219           | -                        | AMNH                | 1                   | FM 14398        |
| <i>Sus scrofa</i>               | <i>Sus scrofa</i>               | herb              |                   | 24.58              | 45418.0                         | 0.180           | -                        |                     | 2                   |                 |
| <i>Tamandua mexicana</i>        | <i>Tamandua mexicana</i>        | carn              |                   | 7.70               | 865.3                           | 0.245           | -                        | BNHM                | 1                   | 1257            |
| <i>Tapirus indicus</i>          | <i>Tapirus indicus</i>          | herb              |                   | 35.26              | 103340.0                        | 0.149           | -                        |                     | 2                   |                 |
| <i>Tapirus terrestris</i>       | <i>Tapirus terrestris</i>       | herb              |                   | 29.90              | 50212.0                         | 0.134           | -                        | ZFMK                | 1                   | MAM 1934.0105   |
| <i>Toxodon burmeisteri</i>      | <i>Toxodon platensis</i>        | herb              |                   | 60.97              | 762687.0                        | 0.143           | -                        | AMNH                | 1                   | 14943           |
| <i>Tragulus javanicus</i>       | <i>Tragulus javanicus</i>       | herb              |                   | 6.98               | 412.4                           | 0.336           | -                        | ZMUZ                | 1                   | 11021           |
| <i>Ursus maritimus</i>          | <i>Ursus maritimus</i>          | carn              |                   | 41.98              | 72996.4                         | 0.188           | -                        |                     | 2                   |                 |

(ctd.)

| Specimen as taken                     | Species name in tree                  | Food <sup>a</sup> | Chew <sup>b</sup> | Femur length<br>cm | Torso volume<br>cm <sup>3</sup> | Free-hull<br>ratio | Mirrored/<br>split torso | Origin <sup>c</sup> | Source <sup>d</sup> | ID<br>at Origin |
|---------------------------------------|---------------------------------------|-------------------|-------------------|--------------------|---------------------------------|--------------------|--------------------------|---------------------|---------------------|-----------------|
| <i>Ursus spelaeus</i>                 | <i>Ursus spelaeus</i>                 | herb              |                   | 45.71              | 161547.0                        | 0.128              | -                        | AMNH                | 1                   | 39416           |
| <i>Vombatus ursinus</i>               | <i>Vombatus ursinus</i>               | herb              |                   | 13.74              | 6447.2                          | 0.215              | -                        | ZMUZ                | 1                   | 11068           |
| <i>Vulpes vulpes</i>                  | <i>Vulpes vulpes</i>                  | carn              |                   | 14.16              | 2358.6                          | 0.220              | -                        | ZFMK                | 1                   | MAM 1933.0126a  |
| <i>Wallabia spp.</i>                  | <i>Wallabia bicolor</i>               | herb              |                   | 17.00              | 5361.8                          | 0.337              | split                    | DMUG                | 1                   | no ID           |
| <i>Otarid spp.</i>                    | <i>Zalophus californianus</i>         | carn              |                   | 7.26               | 9898.8                          | 0.148              | -                        | DMUG                | 1                   | no ID           |
| <b>Birds</b>                          |                                       |                   |                   |                    |                                 |                    |                          |                     |                     |                 |
| <i>Anser anser</i>                    | <i>Anser anser</i>                    | herb              |                   | 8.12               | 2626.3                          | 0.127              | -                        | DMUG                | 1                   | no ID           |
| <i>Apteryx owenii</i>                 | <i>Apteryx owenii</i>                 | herb              |                   | 8.61               | 396.9                           | 0.230              | -                        | BNHM                | 1                   | 2344            |
| <i>Grus spp.</i>                      | <i>Grus grus</i>                      | herb              |                   | 16.23              | 4196.7                          | 0.250              | -                        | DMUG                | 1                   | no ID           |
| <i>Phoenicopterus roseus</i>          | <i>Phoenicopterus roseus</i>          | carn              |                   | 27.13              | 1194.0                          | 0.229              | -                        | DMUG                | 1                   | no ID           |
| <i>Rhea americana</i>                 | <i>Rhea americana</i>                 | herb              |                   | 20.53              | 12239.3                         | 0.229              | -                        | DMUG                | 1                   | no ID           |
| <i>Sagittarius serpentarius</i>       | <i>Sagittarius serpentarius</i>       | carn              |                   | 11.86              | 1334.9                          | 0.206              | -                        | DMUG                | 1                   | no ID           |
| <i>Struthio camelus</i>               | <i>Struthio camelus</i>               | herb              |                   | 32.22              | 73816.9                         | 0.242              | -                        | DMUG                | 1                   | no ID           |
| <b>Non-avian dinosaurs</b>            |                                       |                   |                   |                    |                                 |                    |                          |                     |                     |                 |
| <i>Allosaurus fragilis</i>            | <i>Allosaurus fragilis</i>            | carn              |                   | 84.28              | 774160.0                        | 0.169              | -                        | SMA                 | 3                   | Big Al II       |
| <i>Atlasaurus imelakei</i>            | <i>Atlasaurus imelakei</i>            | herb              | nonchew           | 190.62             | 6535910.0                       | 0.126              | split                    | MMEM                | 3                   | no ID           |
| <i>Bactrosaurus johnsoni</i>          | <i>Bactrosaurus johnsoni</i>          | herb              | chew              | 81.00              | 505908.0                        | 0.232              | -                        | BCNHM               | 3                   | no ID           |
| <i>Datousaurus bashanensis</i>        | <i>Datousaurus bashanensis</i>        | herb              | nonchew           | 119.86             | 2829100.0                       | 0.143              | -                        | ZMNH                | 3                   | no ID           |
| <i>Diplodocus carnegii</i>            | <i>Diplodocus carnegii</i>            | herb              | nonchew           | 158.01             | 6693450.0                       | 0.083              | -                        | MNHB                | 3                   | no ID           |
| <i>Diplodocus longus</i>              | <i>Diplodocus longus</i>              | herb              | nonchew           | 144.33             | 3933920.0                       | 0.127              | -                        | NMSF                | 1                   | no ID           |
| <i>Anatotitan copei</i>               | <i>Edmontosaurus annectens</i>        | herb              | chew              | 118.17             | 1499110.0                       | 0.201              | -                        | AMNH                | 1                   | 5886            |
| <i>Euoplocephalus tutus</i>           | <i>Euoplocephalus tutus</i>           | herb              | nonchew           | 66.54              | 1873940.0                       | 0.261              | -                        | NMSF                | 1                   | no ID           |
| <i>Gastonia burgei</i>                | <i>Gastonia burgei</i>                | herb              | nonchew           | 35.91              | 301690.0                        | 0.280              | -                        | USUEPM              | 1                   | no ID           |
| <i>Gigantspinosaurus sichuanensis</i> | <i>Gigantspinosaurus sichuanensis</i> | herb              | nonchew           | 67.36              | 775033.0                        | 0.281              | -                        | ZMNH                | 3                   | no ID           |
| <i>Brachiosaurus brancai</i>          | <i>Giraffatitan brancai</i>           | herb              | nonchew           | 197.46             | 17029000.0                      | 0.101              | -                        | MNHB                | 5                   | no ID           |
| <i>Iguanodon bernissartensis</i>      | <i>Iguanodon bernissartensis</i>      | herb              | chew              | 102.17             | 2242310.0                       | 0.185              | -                        | NMSF                | 1                   | no ID           |
| <i>Lufengosaurus huenei</i>           | <i>Lufengosaurus huenei</i>           | herb              | nonchew           | 56.38              | 339974.0                        | 0.157              | -                        | BCNHM               | 3                   | no ID           |
| <i>Mamenchisaurus constructus</i>     | <i>Mamenchisaurus constructus</i>     | herb              | nonchew           | 146.74             | 5709280.0                       | 0.194              | -                        | ZMNH                | 3                   | no ID           |
| <i>Mamenchisaurus jingyanensis</i>    | <i>Mamenchisaurus jingyanensis</i>    | herb              | nonchew           | 142.95             | 6206260.0                       | 0.163              | -                        | BCNHM               | 3                   | no ID           |

(ctd.)

| Specimen as taken                   | Species name in tree                  | Food <sup>a</sup> | Chew <sup>b</sup> | Femur length<br>cm | Torso volume<br>cm <sup>3</sup> | Free-hull ratio | Mirrored/<br>split torso | Origin <sup>c</sup> | Source <sup>d</sup> | ID<br>at Origin |
|-------------------------------------|---------------------------------------|-------------------|-------------------|--------------------|---------------------------------|-----------------|--------------------------|---------------------|---------------------|-----------------|
| <i>Omeisaurus yianfuensis</i>       | <i>Omeisaurus yianfuensis</i>         | herb              | nonchew           | 129.40             | 5695660.0                       | 0.065           | -                        | ZMNH                | 3                   | no ID           |
| <i>Plateosaurus engelhardti</i>     | <i>Plateosaurus engelhardti</i>       | herb              | nonchew           | 58.03              | 322912.0                        | 0.102           | -                        | GPIT                | 4                   | RE-07288        |
| <i>Protoceratops andrewsi</i>       | <i>Protoceratops andrewsi</i>         | herb              | chew              | 24.61              | 28244.8                         | 0.456           | -                        | BCNHM               | 3                   | no ID           |
| <i>Shunosaurus lii</i>              | <i>Shunosaurus lii</i>                | herb              | nonchew           | 90.41              | 1730150.0                       | 0.106           | -                        | ZMNH                | 3                   | no ID           |
| <i>Stegosaurus</i>                  | <i>Stegosaurus armatus</i>            | herb              | nonchew           | 78.47              | 802276.0                        | 0.236           | mirr                     | SMA                 | 3                   | Moritz          |
| <i>Stegosaurus stenops</i>          | <i>Stegosaurus stenops</i>            | herb              | nonchew           | 107.66             | 1425560.0                       | 0.213           | -                        | NMSF                | 1                   | no ID           |
| <i>Szechuanosaurus campi</i>        | <i>Szechuanosaurus campi</i>          | carn              |                   | 60.20              | 269308.0                        | 0.143           | -                        | ZMNH                | 3                   | no ID           |
| <i>Tenontosaurus tilletti</i>       | <i>Tenontosaurus tilletti</i>         | herb              | chew              | 71.65              | 411004.0                        | 0.282           | -                        | AMNH                | 1                   | FARB 3034       |
| <i>Triceratops elatus</i>           | <i>Triceratops horridus</i>           | herb              | chew              | 104.74             | 3113700.0                       | 0.239           | -                        | NMSF                | 1                   | no ID           |
| <i>Tyrannosaurus rex</i>            | <i>Tyrannosaurus rex</i>              | carn              |                   | 126.47             | 3762000.0                       | 0.134           | -                        | NMSF                | 1                   | no ID           |
| <i>Yandusaurus multidentis</i>      | <i>Yandusaurus hongheensis</i>        | herb              | nonchew           | 15.80              | 4213.4                          | 0.325           | -                        | ZMNH                | 3                   | no ID           |
| <i>Yangchuanosaurus hepingensis</i> | <i>Yangchuanosaurus shangyouensis</i> | carn              |                   | 98.57              | 974264.0                        | 0.167           | -                        | ZMNH                | 3                   | no ID           |
| <b>Reptiles</b>                     |                                       |                   |                   |                    |                                 |                 |                          |                     |                     |                 |
| <i>Iguana rhinolopha</i>            | <i>Iguana iguana</i>                  | herb              |                   | 9.01               | 1012.1                          | 0.271           | -                        | BNHM                | 1                   | 1260            |
| <i>Sphenodon punctatus</i>          | <i>Sphenodon punctatus</i>            | carn              |                   | 4.42               | 163.8                           | 0.183           | split                    | ZMUZ                | 1                   | no ID           |
| <i>Stenaulorhynchus stockley</i>    | <i>Stenaulorhynchus stockley</i>      | herb              |                   | 17.71              | 33364.7                         | 0.197           | -                        | GPIT                | 1                   | RE-07192        |
| <i>Trilophosaurus buettneri</i>     | <i>Trilophosaurus buettneri</i>       | herb              |                   | 23.88              | 11695.5                         | 0.151           | -                        | AMNH                | 1                   | 7502            |
| <i>Varanus salvator</i>             | <i>Varanus salvator</i>               | carn              |                   | 13.18              | 13188.5                         | 0.105           | -                        | ZMUZ                | 1                   | no ID           |
| <b>Amphibia</b>                     |                                       |                   |                   |                    |                                 |                 |                          |                     |                     |                 |
| <i>Diadectes phaseolinus</i>        | <i>Diadectes phaseolinus</i>          | herb              |                   | 18.75              | 72289.2                         | 0.231           | -                        | AMNH                | 1                   | 4684            |
| <i>Eryops megacephalus</i>          | <i>Eryops megacephalus</i>            | carn              |                   | 19.46              | 32237.5                         | 0.324           | -                        | AMNH                | 1                   | 4657            |

<sup>a</sup>based on Walls (1981), Losos and Greene (1988), Rand et al. (1990), Weishampel et al. (1990), Reisz and Sues (2000), Reisz (2006), Wilman et al. (2014) and the Paleobiology Database ([www.paleobiodb.org](http://www.paleobiodb.org))

<sup>b</sup>based on Weishampel et al. (1990) and Wings and Sander (2007)

<sup>c</sup>for skeletons from sources 1, 3-5: AMNH American Museum of Natural History New York USA, BCNHM = Beijing Natural History Museum China, BNHM = Natural History Museum Basle Switzerland, CZAEPW = Clinic of Zoo Animals Exotic Pets and Wildlife University of Zurich Switzerland, DMUG = Anatomy Museum Department of Morphology Faculty of Veterinary Medicine Ghent University Belgium, MEMM = Moroccan Ministry of Energy and Mining Morocco, MNHB = Natural History Museum Berlin Germany, NMSF = Senckenberg Naturmuseum Frankfurt Germany, GPIT = Paleontological Collection University of Tübingen Germany, SMA = Sauriermuseum Aathal Switzerland, USUEPM = Utah State University Eastern Prehistoric Museum Price USA, ZFMK = Alexander Koenig Research Museum Bonn Germany, ZMNH = Zigong Museum of Natural History China, ZMUZ = Zoological Museum University of Zurich Switzerland, ZZ = Zurich Zoo Switzerland

<sup>d</sup>Sources: 1 = this study, 2 = Sellers et al. (2012), 3 = described in Stoinski et al. (2011), 4 = described in Gunga et al. (2007), 5 = described in Gunga et al. (2008)

### Phylogenetic tree

The phylogenetic tree (Fig. S6) used in the PGLS analysis was constructed based on various sources. The topology was based on a combination of tree sources that included some of the most recent phylogenetic hypotheses. Due to the taxa selection of the present study, which was mainly driven by mounted skeleton availability and the logistics of obtaining their respective scans or photographs, it was not possible to build a supertree based on a character matrix because the taxa considered were too distantly related. Due to the sample, inevitably certain taxonomic groups (i.e., mammals) are more represented than others. The phylogeny includes both fossil and living tetrapods. The basic topology of tetrapod groups is based on tree of life project (Maddison and Schulz, 2007) supplemented with specific references.

*Eryops megacephalus* is here basal to all the other taxa as member of Temnospondyli (extinct group of primitive tetrapods) (Ruta et al., 2007). It is followed by *Diadectes phaseolinus*, the sister taxon of all the Amniota (Berman and Henrici, 2003). Within the Amniota an early split is recognised between the Diapsida and the Synapsida (represented by basal Eupelycosauria, therapsids, and mammals) (Benton, 2014).

Within Diapsida, the sample is characterized by a mix of extant and fossil Sauria. The presence of extant *Sphenodon*, *Iguana* and *Varanus* characterizes the split of Lepidosauriamorpha from Archosauriamorpha that include crocodiles (not present in our study), birds and their fossil relatives (i.e., dinosaurs). The position of *Sphenodon* relative to the other Squamata follows Pyron et al. (Pyron et al., 2013).

Within Archosauromorpha we positioned *Trilophosaurus* and *Stenaulorhynchus* basal to dinosaurs and birds after Ezcurra et al. (Ezcurra et al., 2014) who presented a recent updated phylogeny of Sauria. In their topology *Stenaulorhynchus* is not present however *Trilophosaurus* is positioned basal to Rhynchosauria (the group to which *Stenaulorhynchus* belongs).

Dinosauria is the other large clade of Archosauromorpha. Its topology is based on the supertree of Lloyd et al. (Lloyd et al., 2008) with the manual addition of extant Aves as from the topology in Xu et al. (Xu et al., 2014). The position of certain specific dinosaur taxa was updated such as that of *Datousaurus bashanensis* that is basal to Eusaropoda (Sekiya, 2011) and for *Szechuanosaurus campi* that is closely related to *Yangchuanosaurus* within theropods (Carrano et al., 2012). Modern bird topology was generated after Jetz et al. (Jetz et al., 2012), and Prum et al. (Prum et al., 2015) with respect to the position of the kiwi (*Apteryx owenii*) and the rhea (*Rhea americana*).

Within Synapsida, the position of primitive Eupelycosauria and the general topology of therapsids follows Sidor (Sidor, 2003). The historical *Beselodon magnificus* was updated as *Chiniquodon theotonicus* (member of Eucynodontia) (Abdala and Giannini, 2002), and *Scymnognathus parringtoni* was named *Sauroctonus parringtoni* (Gebauer, 2014).

For mammals the topology of extant taxa was generated following Bininda-Emonds et al. (Bininda-Emonds et al., 2007, Bininda-Emonds et al., 2008) with the addition of specific fossil branches after Raia et al. (Raia et al., 2013). A substantial addition was the inclusion of the fossil Notoungulate *Toxodon* and the Demostylia *Palaeoparadoxia*, whose taxonomic position was recently updated as basal members of Perissodactyla (Cooper et al., 2014, Welker et al., 2015). Following Cooper et al. (Cooper et al., 2014) for *Palaeoparadoxia* also allowed to place the ancient sirenid *Metaxytherium* as sister

taxon of Proboscidea. For fossil Xenathra we followed the topology presented by Gaudin (Gaudin, 2004). The position of Ferae (Carnivora and Creodonta) and basal ungulates follows Raia et al. (Raia et al., 2013) and Spaulding et al. (Spaulding et al., 2009) while the relationship of primates and extant rodents follows Bininda-Emonds et al. (Bininda-Emonds et al., 2007, Bininda-Emonds et al., 2008).

In order to date the tree we opted to combine multiple empirical and analytical approaches. Firstly we recorded first and last occurrence for each taxon with the assumption that last occurrence for all extant species is zero. To avoid bias in relation to the scattered information, we employed the palaeodb website (<http://fossilworks.org/?page=paleodb>) to record species' time ranges. When a particular species was not present in the database, we used the genus range or conservatively stratigraphic clues based on the literature. We then employed the script 'timePaleoPhy' from the R package 'paleotree' (Bapst, 2013) to constrain time of divergence of taxa based on their stratigraphic occurrences. This script follows the same method proposed by Brusatte et al. (Brusatte et al., 2008) to date the supertree of fossil dinosaurs. In addition, we constrained the tree internal nodes based on Ksepka et al. (Ksepka et al., 2015). The list of nodes and their respective dates (Table S2) was compiled after searching the fossil calibration database that includes some but not all of the internal nodes for our topology.

**Table S2.** Time of divergence provided for different nodes in the tree. Dates are conservatively based on the maximum nodal age reported on the website <http://fossilcalibrations.org/> developed by Ksepka et al. (Ksepka et al., 2015). All the other internal nodes ages were set to 'NA' and automatically generated using the script `timepaleophy` (Bapst, 2013).

| Node # | Node label       | Time  |
|--------|------------------|-------|
| 1      | Tetrapoda        | 351   |
| 3      | Amniota          | 332.9 |
| 11     | Theria           | 169.6 |
| 14     | Boreoeutheria    | 164.6 |
| 15     | Euarchontoglires | 164.6 |
| 16     | Rodentia         | 66    |
| 19     | Primates         | 66    |
| 25     | Whippomorpha     | 66    |
| 29     | Bovidae          | 28.1  |
| 56     | Carnivora        | 66    |
| 73     | Xenarthra        | 164.6 |
| 76     | Afrotheria       | 164.6 |
| 78     | Sirenia          | 66    |
| 79     | Proboscidea      | 23.03 |
| 83     | Marsupialia      | 131.3 |
| 89     | Diapsida         | 295.9 |
| 90     | Archosauromorpha | 255.9 |
| 92     | Dinosauria       | 235   |
| 93     | Ornithischia     | 230   |
| 105    | Sauropodomorpha  | 232   |
| 120    | Palaeognathae    | 86.8  |
| 122    | Neognathae       | 86.8  |
| 123    | Neoaves          | 60.2  |
| 125    | Lepidosauria     | 252.7 |
| 126    | Squamata         | 209.5 |





### Outliers

Three outliers were eliminated from the dataset used in the main study after visual inspection: the flamingo (*Phoenicopterus*), the sirenian (*Metaxytherium*) and the sea lion (*Zalophus*) (Fig. S7). In the case of the flamingos, we can only speculate that its typical diet - shrimp and algae caught in the filter system of the beak (Zweers et al., 1995) - is so small and requires so little processing that a particularly small gastrointestinal tract and coelomic cavity is feasible, and/or that flamingos have particularly long legs for their body volume. In the case of the marine mammals, it is plausible that the different mechanical constraints of their lifestyle leads to systematically different proportions of limbs and torso (Jones and Pierce, 2016).

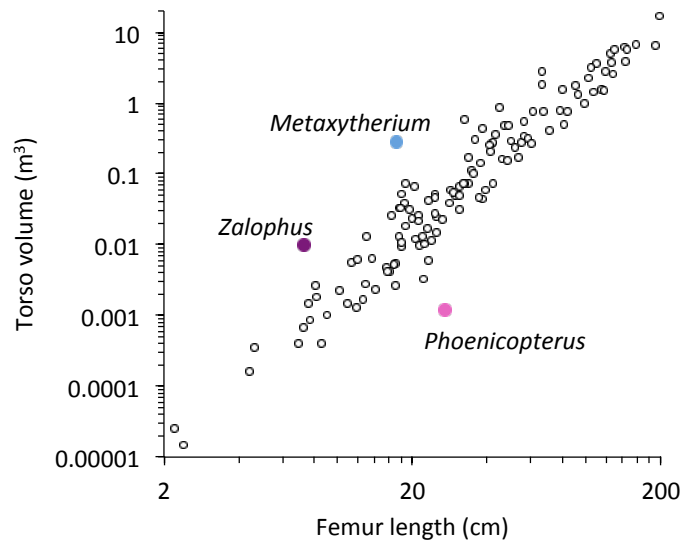

**Figure S7.** Visual outlier inspection: exclusion of the flamingo (combination of very long femur and very small torso) and two marine mammals (combination of very short femurs and very voluminous torsos)

### Considerations about body mass in relation to torso volume

While the necessity to control for body size is self-evident, the answer to the question about which proxy is most suitable is not. Body mass is the most common basis against which other morphological and physiological measures are compared (Peters, 1983, Calder, 1996, Sibly et al., 2012). However, the volume of the torso represents a major proportion of overall body mass. Therefore, differences in torso volume most certainly are reflected in body mass differences already. On the other hand, we could hence predict that we could use body mass itself as a proxy for 'torso volume', and the relationship of body mass to femur length should resemble that of torso volume to femur length.

For the testing of these hypotheses, a valid dataset is required where all measurements are taken from the same, healthy individuals. In particular, when using body mass in this way, the feeding status of the animals used for the measurement is critical. To our knowledge, the largest dataset on femur length and body mass is presented by Campione and Evans (2012); however, the methods do not indicate a protocol about the feeding status, i.e. the degree of gut fill, in the animals. In particular in herbivores, gut fill represents a constant, relevant proportion of body mass (Clauss et al., 2013) that is considered the reason for their larger torso volumes. Using the elephant as an example, Clauss et al. (2005) demonstrated how the feeding status of animals whose body mass and gut fill are measured can influence the position of a species in comparative datasets. To date, most likely, no completely reliable large data collection on body mass and femur length exists. However, it is noteworthy that in the data evaluated by Campione and Evans (2012), there is a difference in the femur length-body mass relationship between Carnivora (i.e., mainly carnivores) and Ungulata (i.e., mainly herbivores) that could indicate that, at comparable femur length, Ungulata have higher body masses than Carnivora - a finding that would corroborate the prediction made above. Campione and Evans (2012) demonstrate that femur circumference is better related to body mass than femur length; for the question of our study this means that femur circumference would probably be a less suitable proxy as it equalizes differences in body mass at similar stature.

To perform an explorative test of these considerations, we compiled body mass data for the extant mammals, birds and reptiles of our dataset from a single source - the Animal Diversity Web ([www.animaldiversity.org](http://www.animaldiversity.org), accessed 25.05.2016). We consistently collected the mean (or calculated it from the minimum and maximum provided), even if in some cases the data given did not appear intuitively correct, added it to our own dataset (Table S1), and performed analyses using the same methods as outlined in the main text.

There was a linear relationship (scaling including the exponent of 1.0 in the 95%CI) between torso volume and body mass, with no influence of diet (Table S3). In contrast, there was an expected cubic scaling for the relationship of body mass and femur length, and diet was a significant factor, suggesting that for similar femur lengths, herbivores have higher body masses than carnivores (Table S4).

**Table S3.** Results of statistical analyses according to Torso volume = *a* (factor) Body mass<sup>*b*</sup> (and the corresponding factor\*Body mass interaction) in Ordinary Least Squares (OLS) and Phylogenetic Generalized Least Squares (PGLS) for extant mammals, birds and reptiles (n=63)

| Stats | $\lambda$ | <b>a</b>          |        | <b>b</b>             |        | <b>factor<sup>#</sup></b>           |       | <b>interaction<sup>†</sup></b> |
|-------|-----------|-------------------|--------|----------------------|--------|-------------------------------------|-------|--------------------------------|
|       |           | (95%CI)           | p      | (95%CI)              | p      | (95%CI)                             | p     | p                              |
| OLS   | (0)       | 384<br>(286, 515) | <0.001 | 0.94<br>(0.88, 1.00) | <0.001 | <i>Diet</i><br>1.07<br>(0.77, 1.48) | 0.680 | n.s.                           |
| PGLS  | 0         | 384<br>(286, 515) | <0.001 | 0.94<br>(0.88, 1.00) | <0.001 | 1.07<br>(0.77, 1.48)                | 0.681 | n.s.                           |

this is only an explorative analysis with Body mass estimates that have no connection to the Torso volume data generated in this study  
Torso volume in cm<sup>3</sup>, Body mass in kg

<sup>#</sup>factor coding: Diet (carnivore = 0, herbivore = 1)

<sup>†</sup>models were calculated with interaction term first; if this was not significant, the model was again calculated without the interaction term; estimates for the factor in this table always represent the models where either the interaction was significant or excluded

**Table S4.** Results of statistical analyses according to Body mass = *a* (factor) Femur length<sup>*b*</sup> (and the corresponding factor\*Femur length interaction) in Ordinary Least Squares (OLS) and Phylogenetic Generalized Least Squares (PGLS) for extant mammals, birds and reptiles (n=63)

| Stats | $\lambda$ | <b>a</b>                |        | <b>b</b>             |        | <b>factor<sup>#</sup></b>           |       | <b>interaction<sup>†</sup></b> |
|-------|-----------|-------------------------|--------|----------------------|--------|-------------------------------------|-------|--------------------------------|
|       |           | (95%CI)                 | p      | (95%CI)              | p      | (95%CI)                             | p     | p                              |
| OLS   | (0)       | 0.004<br>(0.002, 0.007) | <0.001 | 2.98<br>(2.78, 3.19) | <0.001 | <i>Diet</i><br>1.75<br>(1.20, 2.55) | 0.005 | n.s.                           |
| PGLS  | 0         | 0.004<br>(0.002, 0.007) | <0.001 | 2.98<br>(2.78, 3.19) | <0.001 | 1.75<br>(1.20, 2.55)                | 0.005 | n.s.                           |

this is only an explorative analysis with Body mass estimates that have no connection to the Femur length data generated in this study  
Body mass in kg, Femur length in cm

<sup>#</sup>factor coding: Diet (carnivore = 0, herbivore = 1)

<sup>†</sup>models were calculated with interaction term first; if this was not significant, the model was again calculated without the interaction term; estimates for the factor in this table always represent the models where either the interaction was significant or excluded

## References

- Abdala F, Giannini NP** (2002) Chiniquodontid cynodonts: systematic and morphometric considerations. *Palaeontology*, **45**, 1151-1170.
- Bapst DW** (2013) A stochastic rate-calibrated method for time-scaling phylogenies of fossil taxa. *Methods Ecol Evol*, **4**, 724-733.
- Benton MJ** (2014) *Vertebrate palaeontology*, Wiley Blackwell, Oxford UK.
- Berman DS, Henrici AC** (2003) Homology of the astragalus and structure and function of the tarsus of Diadectidae. *J Paleontol*, **77**, 172-188.
- Bininda-Emonds ORP, Cardillo M, Jones KE, et al.** (2007) The delayed rise of present-day mammals. *Nature*, **446**, 507-512.
- Bininda-Emonds ORP, Cardillo M, Jones KE, et al.** (2008) Corrigendum: The delayed rise of present-day mammals. *Nature*, **456**, 274.
- Brusatte SL, Benton MJ, Ruta M, Lloyd GT** (2008) Superiority, competition, and opportunism in the evolutionary radiation of dinosaurs. *Science*, **321**, 1485-1488.
- Calder WA** (1996) *Size, function and life history*, Harvard University Press, Cambridge, MA.
- Campione NE, Evans DC** (2012) A universal scaling relationship between body mass and proximal limb bone dimensions in quadrupedal terrestrial tetrapods. *BMC Biol*, **10**, 60 (21 pages).
- Carrano MT, Benson RB, Sampson SD** (2012) The phylogeny of Tetanurae (Dinosauria: Theropoda). *Journal of Systematic Palaeontology*, **10**, 211-300.
- Clauss M, Robert N, Walzer C, Vitaud C, Hummel J** (2005) Testing predictions on body mass and gut contents: dissection of an African elephant (*Loxodonta africana*). *Eur J Wildl Res*, **51**, 291-294.

**Clauss M, Steuer P, Müller DWH, Codron D, Hummel J** (2013) Herbivory and body size: allometries of diet quality and gastrointestinal physiology, and implications for herbivore ecology and dinosaur gigantism. *PloS One*, **8**, e68714.

**Cooper LN, Seiffert ER, Clementz M, et al.** (2014) Anthracobunids from the middle Eocene of India and Pakistan are stem perissodactyls. *PloS One*, **9**, e109232.

**Ezcurra MD, Scheyer TM, Butler RJ** (2014) The origin and early evolution of Sauria: reassessing the Permian saurian fossil record and the timing of the crocodile-lizard divergence. *PLoS One*, **9**, e89165.

**Gaudin TJ** (2004) Phylogenetic relationships among sloths (Mammalia, Xenarthra, Tardigrada): the craniodental evidence. *Zoological Journal of the Linnean Society*, **140**, 255-305.

**Gebauer EVI** (2014) Re-assessment of the taxonomic position of the specimen GPIT/RE/7113 (*Sauroctonus parringtoni* comb. nov., Gorgonopsia). In *Early evolutionary history of the Synapsida* (eds Kammerer CF, Angielczyk KD, Fröbisch J), pp. 185-207. Dordrecht: Springer.

**Gunga H-C, Suthau T, Bellmann A, et al.** (2007) Body mass estimations for *Plateosaurus engelhardti* using laser scanning and 3D reconstruction methods. *Naturwiss*, **94**, 623-630.

**Gunga H-C, Suthau T, Bellmann A, et al.** (2008) A new body mass estimation of *Brachiosaurus brancai* Janensch, 1914 mounted and exhibited at the Museum of Natural History (Berlin, Germany). *Fossil Rec*, **11**, 28-33.

**Jetz W, Thomas GH, Joy JB, Hartmann K, Mooers AO** (2012) The global diversity of birds in space and time. *Nature*, **491**, 444-448.

- Jones KE, Pierce SE** (2016) Axial allometry in a neutrally buoyant environment: effects of the terrestrial-aquatic transition on vertebral scaling. *J Evol Biol*, **29**, 594-601.
- Ksepka DT, Parham JF, Allman JF, et al.** (2015) The Fossil Calibration Database - a new resource for divergence dating. *Syst Biol*, **64**, 853-859.
- Lloyd GT, Davis KE, Pisani D, et al.** (2008) Dinosaurs and the Cretaceous terrestrial revolution. *Proc R Soc B*, **275**, 2483-2490.
- Losos JB, Greene HW** (1988) Ecological and evolutionary implications of diet in monitor lizards. *Biol J Linn Soc*, **35**, 379-407.
- Maddison DR, Schulz K-S** (2007) The tree of life web project. <http://tolweb.org>. *last accessed 20032016*.
- Peters RH** (1983) *The ecological implications of body size*, Cambridge University Press, Cambridge.
- Prum RO, Berv JS, Dornburg A, et al.** (2015) A comprehensive phylogeny of birds (Aves) using targeted next-generation DNA sequencing. *Nature*, **526**, 569-573.
- Pyron RA, Burbrink FT, Wiens JJ** (2013) A phylogeny and revised classification of Squamata, including 4161 species of lizards and snakes. *BMC Evolutionary Biology*, **13**, 93.
- Raia P, Carotenuto F, Passaro F, et al.** (2013) Rapid action in the Palaeogene, the relationship between phenotypic and taxonomic diversification in Coenozoic mammals. *Proc R Soc B*, **280**, 20122244.
- Rand AS, Dugan BA, Monteza H, Vianda D** (1990) The diet of a generalized folivore: *Iguana iguana* in Panama. *Journal of Herpetology*, **24**, 211-214.

- Reisz RR** (2006) Origin of dental occlusion in tetrapods: signal for terrestrial vertebrate evolution? *J Exp Zool*, **306B**, 261-277.
- Reisz RR, Sues HD** (2000) Herbivory in late Paleozoic and Triassic terrestrial vertebrates. In *Evolution of herbivory in terrestrial vertebrates: Perspectives from the fossil record* (ed Sues HD), pp. 9-41. Cambridge: Cambridge University Press.
- Ruta M, Pisani D, Lloyd GT, Benton MJ** (2007) A supertree of Temnospondyli: cladogenetic patterns in the most species-rich group of early tetrapods. *Proc R Soc B*, **274**, 3087-3095.
- Sekiya T** (2011) Re-examination of *Chuanjiesaurus anaensis* (Dinosauria: Sauropoda) from the Middle Jurassic Chuanjie Formation, Lufeng County, Yunnan Province, southwest China. *Memoir of the Fukui Prefectural Dinosaur Museum*, **10**, 1-54.
- Sellers WI, Hepworth-Bell J, Falkingham PL, et al.** (2012) Minimum convex hull mass estimations of complete mounted skeletons. *Biol Lett*, **8**, 842-845.
- Sibly RM, Brown JH, Kodric-Brown A** (2012) Metabolic ecology. A scaling approach.). Chichester, UK: Wiley-Blackwell.
- Sidor CA** (2003) Evolutionary trends and the origin of the mammalian lower jaw. *Palaeobiol*, **29**, 605-640.
- Spaulding M, O'Leary MA, Gatesy J** (2009) Relationships of Cetacea (Artiodactyla) among mammals: increased taxon sampling alters interpretations of key fossils and character evolution. *PLoS One*, **4**, e7062.
- Stoinski S, Suthau T, Gunga H-C** (2011) Reconstructing body volume and surface area of dinosaurs using laser scanning and photogrammetry. In *Understanding the life of*



*giants The biology of the sauropod dinosaurs* (eds Klein N, Remes K, Gee CT, Sander M), pp. 94-115. Bloomington: Indiana University Press.

**Walls GY** (1981) Feeding ecology of the tuatara (*Sphenodon punctatus*) on Stephens Island, Cook Strait. *New Zealand Journal of Ecology*, **4**, 89-97.

**Weishampel DB, Dodson P, Osmolska A** (1990) *The dinosauria*, University of California Press, Berkeley.

**Welker F, Collins MJ, Thomas JA, et al.** (2015) Ancient proteins resolve the evolutionary history of Darwin's South American ungulates. *Nature*, **522**, 81-84.

**Wilman H, Belmaker J, Simpson J, de la Rosa C, Rivadeneira MM, Jetz W** (2014) Elton traits 1.0: Species-level foraging attributes of the world's birds and mammals. *Ecology*, **95**, 2027.

**Wings O, Sander PM** (2007) No gastric mill in sauropod dinosaurs: new evidence from analysis of gastrolith mass and function in ostriches. *Proc R Soc B*, **274**, 635-640.

**Xu X, Han F, Zhao Q** (2014) Homologies and homeotic transformation of the theropod 'semilunate' carpal. *Scientific Reports*, **4**, 6042.

**Zweers G, de Jong F, Berkhoudt H** (1995) Filter feeding in flamingos (*Phoenicopterus ruber*). *Condor*, **97**, 297-324.
